# Supplementary material for: Enhanced activity of vancomycin by encapsulation in hybrid magnetic nanoparticles conjugated to a cell-penetrating peptide
Source: Royal Society of Chemistry journal article supplement (doi:10.1039/c9nr09687f), 2020-01-01
Supplement: c9nr09687f1.pdf [file c9nr09687f1.pdf]

## Supporting Information

### Enhanced activity of vancomycin by encapsulation in hybrid magnetic nanoparticles conjugated to a cell-penetrating peptide

*Short title: Vancomycin hybrid magnetic nanoparticles*

Wenjie Zhang<sup>1</sup>, Reza Taheri-Ledari<sup>2</sup>, Zoleikha Hajizadeh<sup>2</sup>, Ehsan Zolfaghari<sup>2</sup>, Mohammad Reza Ahghari<sup>2</sup>, Ali Maleki<sup>\*2</sup>, Michael R. Hamblin<sup>3,4,5,\*</sup>, Ye Tian<sup>\*6</sup>

<sup>1</sup>Department of Nuclear Medicine, West China Hospital of Sichuan University, #37 Guoxue Alley, Chengdu, 610041, Sichuan province, P.R. China

<sup>2</sup>Catalysts and Organic Synthesis Research Laboratory, Department of Chemistry, Iran University of Science and Technology, Tehran 16846-13114, Iran

<sup>3</sup>Wellman Center for Photomedicine, Massachusetts General Hospital, Boston, MA 02114, USA

<sup>4</sup>Department of Dermatology, Harvard Medical School, Boston, MA 02115, USA

<sup>5</sup>Laser Research Centre, Faculty of Health Science, University of Johannesburg, Doornfontein 2028, South Africa

<sup>6</sup> West China Hospital of Stomatology, Sichuan University, Sichuan province, P.R. China

\*Corresponding authors. E-mail addresses: [maleki@iust.ac.ir](mailto:maleki@iust.ac.ir) (A. Maleki), [hamblin@helix.mgh.harvard.edu](mailto:hamblin@helix.mgh.harvard.edu) (M.R. Hamblin), [tianye@scu.edu.cn](mailto:tianye@scu.edu.cn) (Ye Tian).

| Content                                                                                                                                                              | Page       |
|----------------------------------------------------------------------------------------------------------------------------------------------------------------------|------------|
| <b>Figure S1.</b> Physiochemical properties of synthesized CPP <sup>*a</sup>                                                                                         | <b>S2</b>  |
| <b>Table S1.</b> Related areas and retention times of all present ingredients and impurities of CPP <sup>b</sup>                                                     | <b>S3</b>  |
| <b>Table S2.</b> Detailed information of the synthesized CPP (LC-MS analysis)                                                                                        | <b>S4</b>  |
| <b>Table S3.</b> <i>In vitro</i> VAN release using UV-vis spectrophotometry                                                                                          | <b>S5</b>  |
| <b>Figure S2.</b> UV-vis spectra of fushin and crystal violet for cell staining                                                                                      | <b>S6</b>  |
| <b>Figure S3.</b> Photoluminescence (PL) spectra of MCCC@VAN                                                                                                         | <b>S7</b>  |
| <b>Figure S4.</b> TGA curves of Fe <sub>3</sub> O <sub>4</sub> /SiO <sub>2</sub> /PVA/SH (4) and Fe <sub>3</sub> O <sub>4</sub> /SiO <sub>2</sub> /PVA/SH-12%VAN (5) | <b>S8</b>  |
| <b>Figure S5.</b> TEM images of the bacteria cells after MCCCs uptake.                                                                                               | <b>S9</b>  |
| Statistical study and estimation of the errors and standard deviations for OD experiment                                                                             | <b>S10</b> |
| <b>Table S4.</b> Statistical data of OD experiment on <i>S. aureus</i> cell line                                                                                     | <b>S12</b> |
| <b>Table S5.</b> Statistical data of OD experiment on <i>E. coli</i> cell line                                                                                       | <b>S13</b> |
| <b>Table S6.</b> Statistical data of ZOI experiment                                                                                                                  | <b>S14</b> |

\*Cell-penetrating hexapeptide

<sup>a</sup> Predicted by online software (Pepcalc.com)

<sup>b</sup> Obtained from RP-HPLC

## PepCalc.com - Peptide property calculator

|                         |                    |            |              |                   |
|-------------------------|--------------------|------------|--------------|-------------------|
| N-terminus              | Sequence           | C-terminus | AA code used | <b>Calculate!</b> |
| Fmoc                    | arghisprophealagly | AFC        | single-lette |                   |
| Disulphide connectivity |                    |            |              |                   |

Show abbreviations      20 standard amino acids      modified amino acids      unusual amino acids

### Sequence submission

Single letter code:      arghisprophealagly

**Get a quotation**

### Sequence interpretation

Single letter code:      Fmoc- ARGHISPROP HEALAGLY -AFC

Triple letter code:      Fmoc- Ala - Arg - Gly - His - Ile - Ser - Pro - Arg - Orn - Pro - His - Glu - Ala - Leu - Ala - Gly - Leu - Tyr -AFC

### Physicochemical properties

|                         |                                      |                                  |
|-------------------------|--------------------------------------|----------------------------------|
| Number of residues:     | 18                                   |                                  |
| Molecular weight:       | 906.59 g/mol                         | <i>notes on MW</i>               |
| Extinction coefficient: | 1280 M <sup>-1</sup> cm <sup>1</sup> | <i>notes on Ext. Coefficient</i> |
| Iso-electric point:     | pH 10.93                             | <i>notes on pI</i>               |
| Net charge at pH 7:     | 1.2                                  | <i>notes on net charge</i>       |
| Estimated solubility:   | Poor water solubility.               | <i>notes on solubility</i>       |

### Net charge vs pH

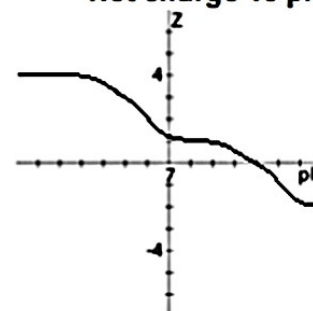

Figure S1. Physicochemical properties of synthesized CPP

Chromatogram Info:

File Name : D:\RIGOL HPLC Data\CRGDK\Data\QC-97739.PRM File Created : 12/12/2018 08:50:11 طب  
 Origin : Acquired, Acquisition started 12/12/2018 07:48:08 طب Acquired Date : 12/12/2018 08:50:11 طب  
 Project : D:\RIGOL HPLC Data\Projects\CRGDK.PRJ By : NDN

Sample Info:

Sample ID : QC-97739 Amount : 0  
 Sample : TAH pure ISTD Amount : 0  
 Inj. Volume [mL] : 0 Dilution : 1

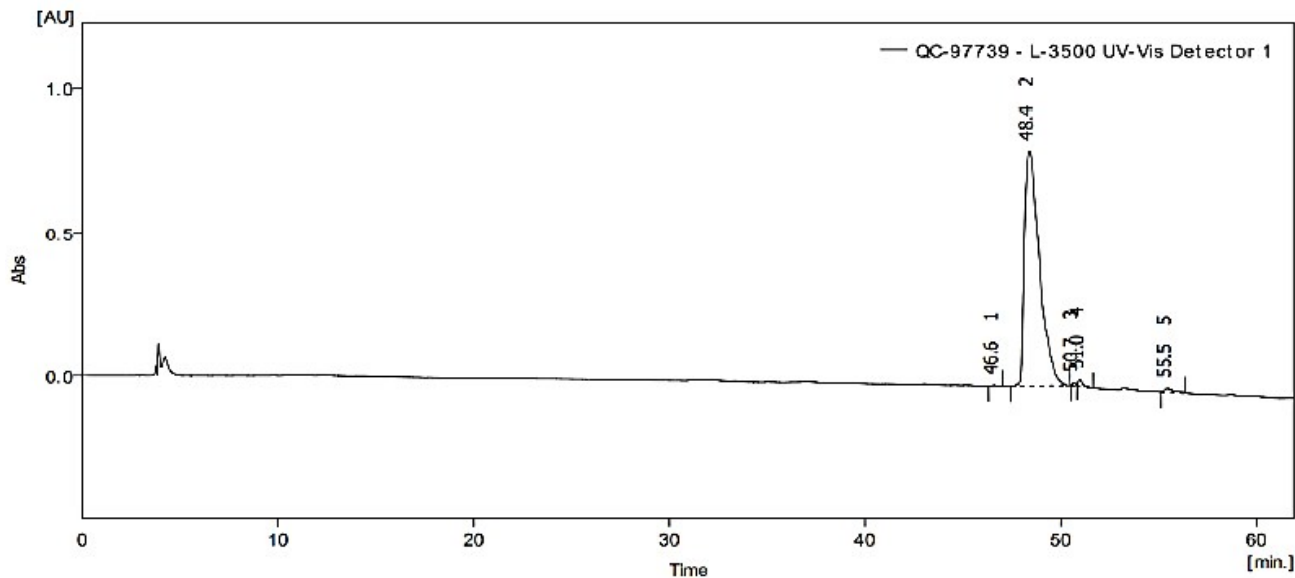

Result Table (Uncal - QC-97739 - L-3500 UV-Vis Detector 1)

|   | Reten. Time [min] | Area [mAU.s] | Height [mAU] | Area [%] | Height [%] | W05 [min] | Compound Name |
|---|-------------------|--------------|--------------|----------|------------|-----------|---------------|
| 1 | 46.597            | 44.018       | 2.709        | 0.098    | 0.3        | 0.24      |               |
| 2 | 48.410            | 43883.229    | 822.111      | 97.923   | 94.3       | 0.83      |               |
| 3 | 50.683            | 138.138      | 10.878       | 0.308    | 1.2        | 0.26      |               |
| 4 | 50.980            | 382.581      | 24.197       | 0.854    | 2.8        | 0.22      |               |
| 5 | 55.453            | 366.221      | 12.178       | 0.817    | 1.4        | 0.41      |               |
|   | Total             | 44814.186    | 872.072      | 100.000  | 100.0      |           |               |

Table S1. Related areas and retention times of all present ingredients and impurities of CPP

# Qualitative Analysis Report

|                 |                   |                        |                 |
|-----------------|-------------------|------------------------|-----------------|
| Data Filename   | mr-rt-2392-pep-.d | Sample Name            | mr-rt-2392-pep- |
| Sample Type     | Sample            | Position               | Vial 11         |
| Instrument Name | Instrument 1      | User Name              |                 |
| Acq Method      | General n.m       | IRM Calibration Status | Success         |
| DA Method       | hashiri.m         | Comment                |                 |

## User Spectra

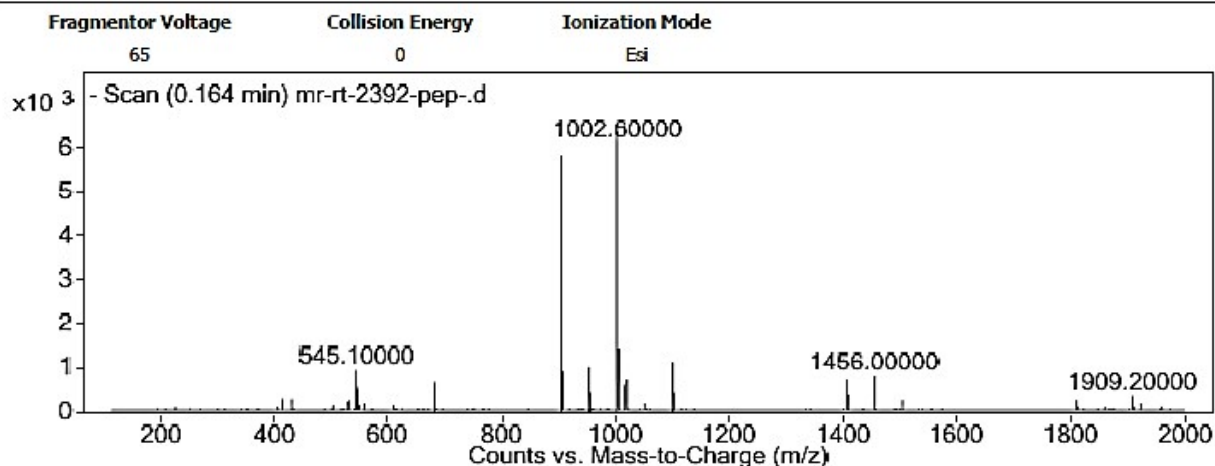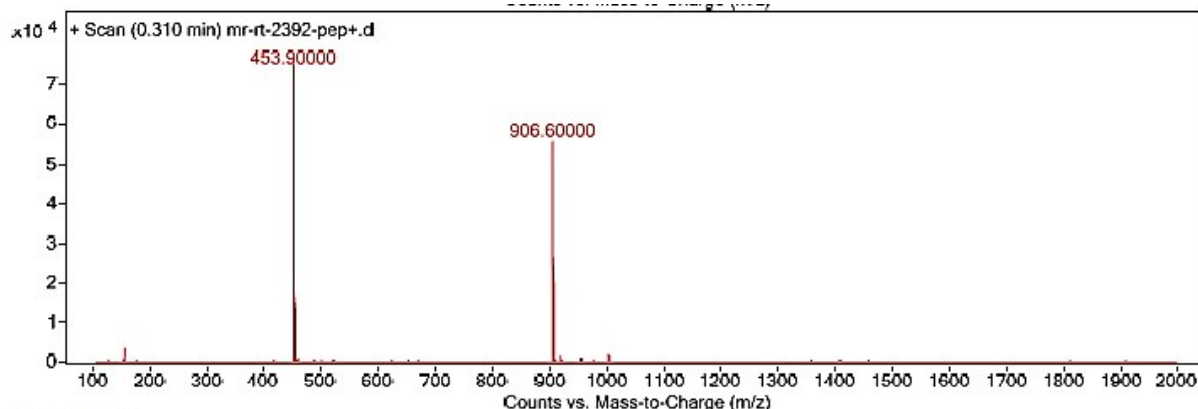

--- End of Report ---

### Peak List

| <i>m/z</i> | <i>z</i> | Abund. |
|------------|----------|--------|
| 545.1      |          | 918    |
| 904.6      |          | 5790   |
| 905.5      | 1        | 3630   |
| 906.5      | 1        | 900    |
| 953.6      |          | 989    |
| 954        |          | 934    |
| 1002.6     |          | 6359   |
| 1003.5     |          | 3477   |
| 1004.4     |          | 1396   |
| 1100.5     |          | 1109   |

--- End Of Report ---

**Table S2.** Detailed information of the synthesized CPP (LC-MS analysis).

**Table S3.** *In vitro* VAN release using UV-vis spectrophotometry.

| Entry | Medium (pH)                | Time (min) | A <sup>a*</sup> (a. u.) |
|-------|----------------------------|------------|-------------------------|
| 1     | Acetate buffer 0.1 M (5.6) | 15         | 0.198                   |
| 2     | Acetate buffer 0.1 M (5.6) | 30         | 0.322                   |
| 3     | Acetate buffer 0.1 M (5.6) | 60         | 0.41                    |
| 4     | Acetate buffer 0.1 M (5.6) | 120        | 0.396                   |
| 5     | Acetate buffer 0.1 M (5.6) | 180        | 0.382                   |
| 6     | PBS 0.1 M (7.2)            | 15         | 0.09                    |
| 7     | PBS 0.1 M (7.2)            | 30         | 0.213                   |
| 8     | PBS 0.1 M (7.2)            | 60         | 0.315                   |
| 9     | PBS 0.1 M (7.2)            | 120        | 0.376                   |
| 10    | PBS 0.1 M (7.2)            | 180        | 0.418                   |
| 11    | PBS 0.1 M (7.2)            | 240        | 0.416                   |
| 12    | PBS 0.1 M (9.0)            | 15         | 0.191                   |
| 13    | PBS 0.1 M (9.0)            | 30         | 0.346                   |
| 14    | PBS 0.1 M (9.0)            | 60         | 0.414                   |
| 15    | PBS 0.1 M (9.0)            | 120        | 0.412                   |
| 16    | PBS 0.1 M (9.0)            | 180        | 0.402                   |

<sup>a</sup>UV-vis absorbance at 220 nm, <sup>\*</sup>all samples were diluted 1/100 with medium.

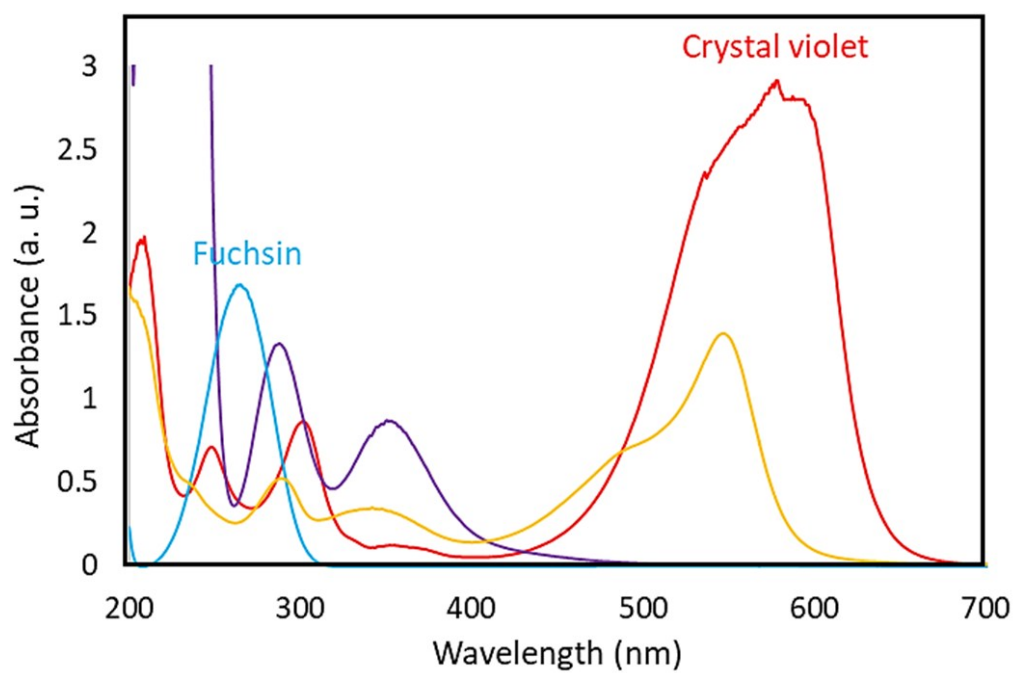

**Figure S2.** UV-vis spectra of fuchsin and crystal violet for cell staining.

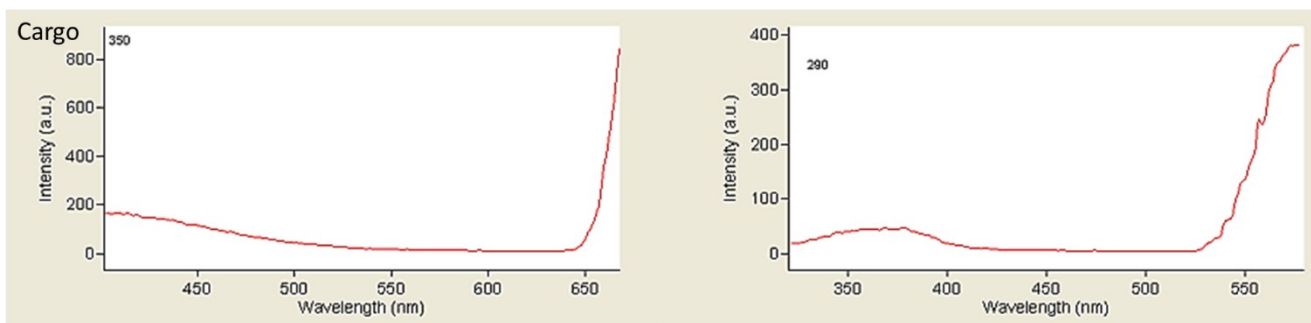

MCCC@VAN

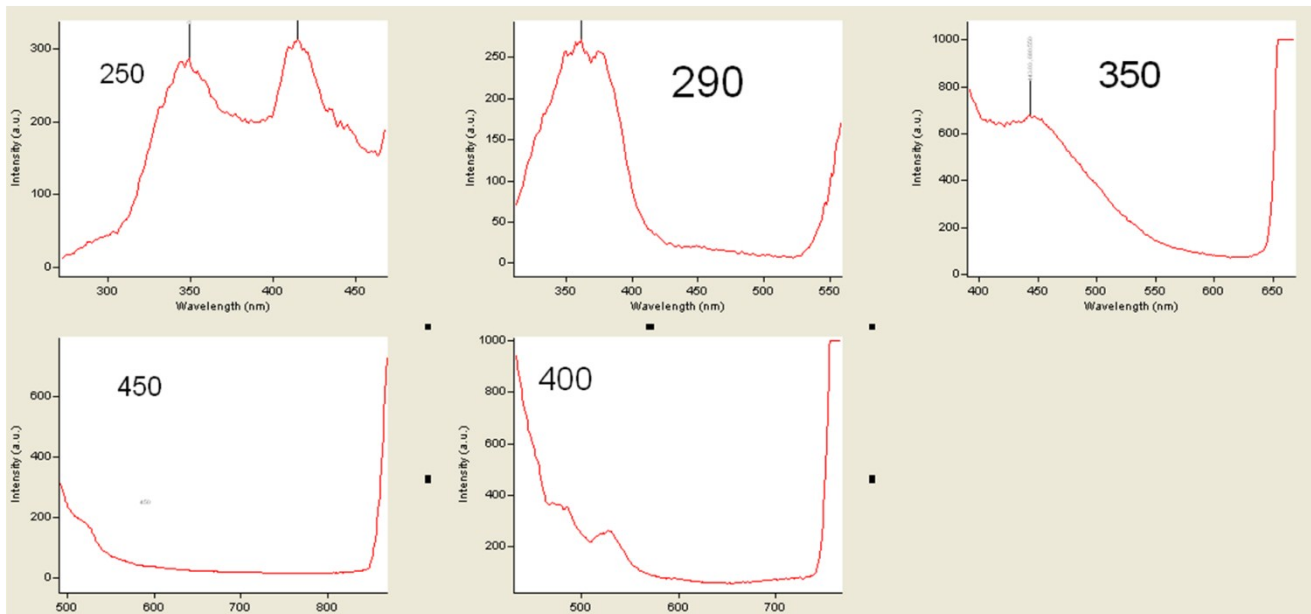

**Figure S3.** Photoluminescence (PL) spectra of MCCC@VAN.

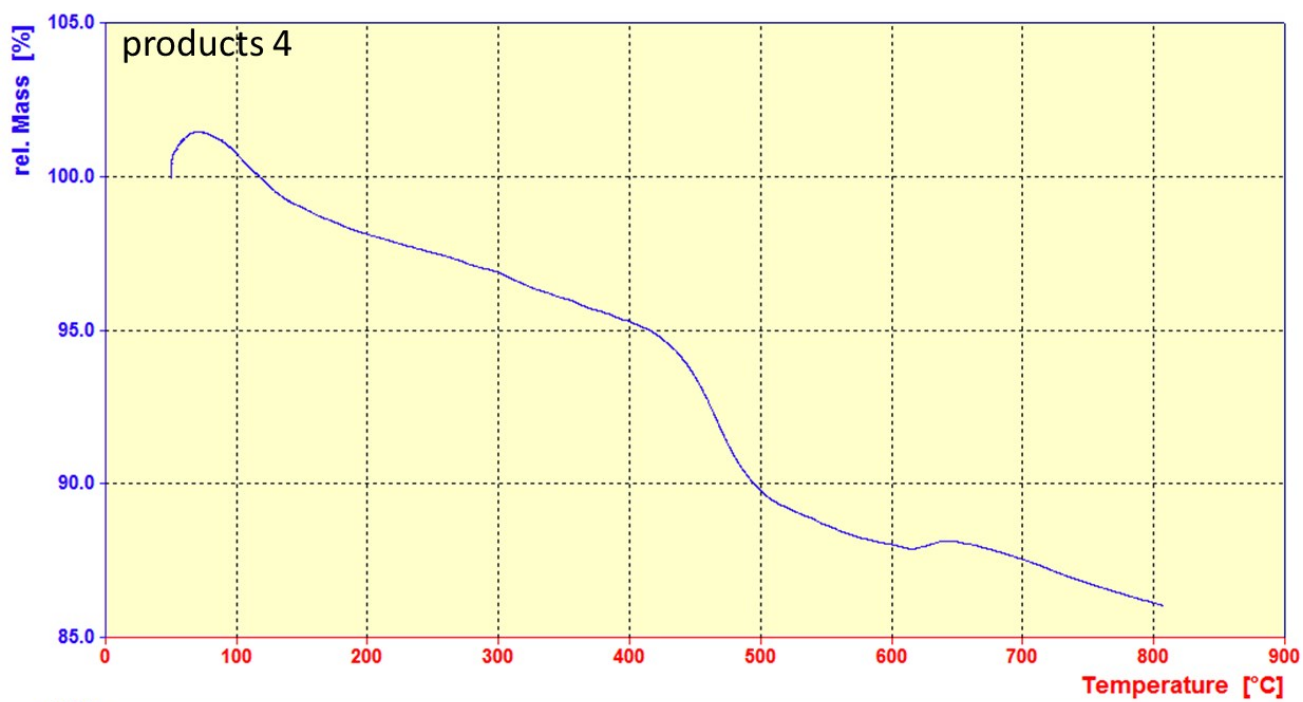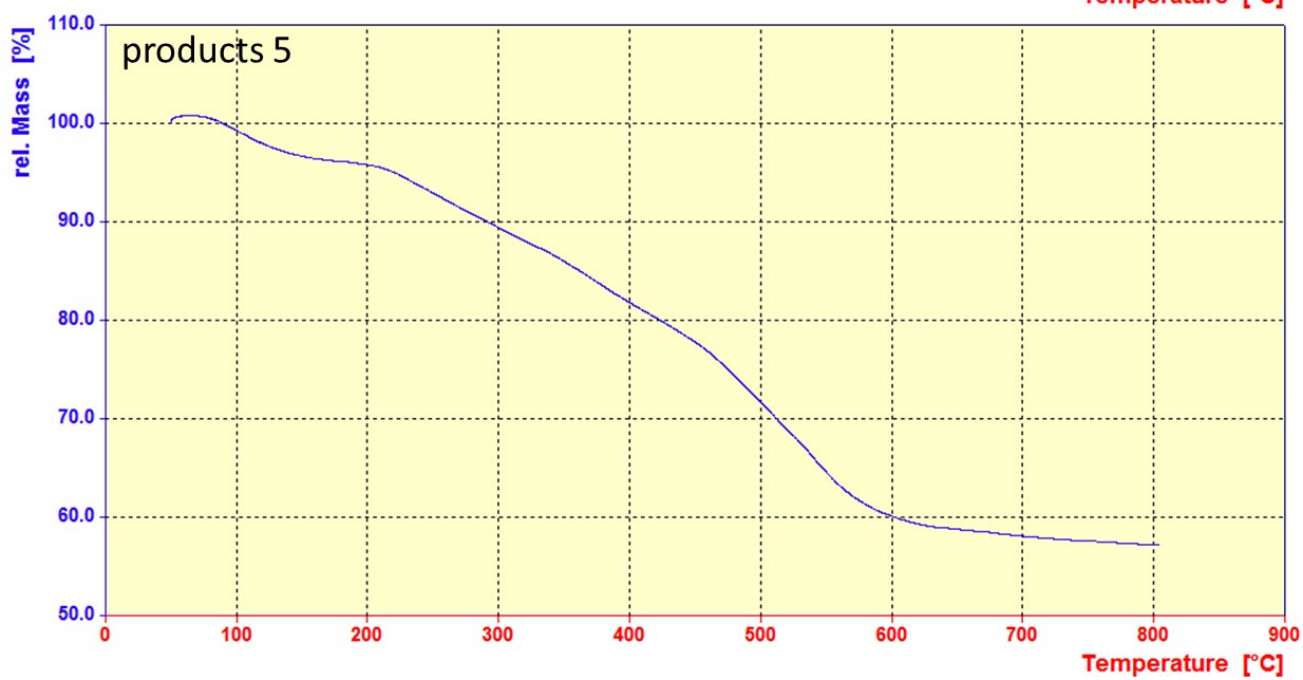

Figure S4. TGA curves of  $\text{Fe}_3\text{O}_4/\text{SiO}_2/\text{PVA}/\text{SH}$  (4) and  $\text{Fe}_3\text{O}_4/\text{SiO}_2/\text{PVA}/\text{SH}-12\%\text{VAN}$  (5)



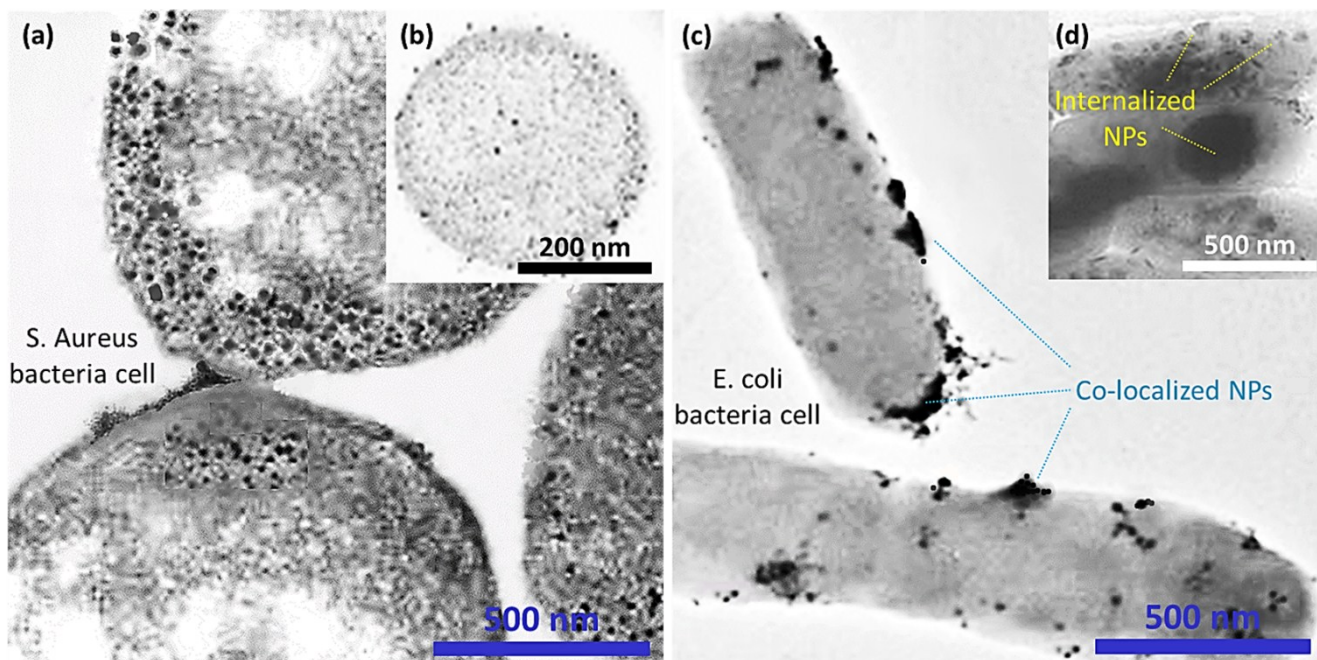

**Figure S5.** TEM images of the internalized MCCC@12%VAN NPs into the: *S. aureus* cells after 30 (a) and 180 min (b), and *E. coli* cells after 30 (c) and 180 min (d) [dark particles are likely co-localized and attached onto the surface of the bacteria cell, and light particles have been internalized]. In the image (d) particle accumulation has also been occurred in some areas.

**Statistical study and estimation of the errors and standard deviations for OD experiment:**

To perform a statistical assessment for OD experiment, three identical samples of each condition (totally nine conditions) were tested using a 96-well plate via incubation at 37 °C, for 30, 60, and 180 min (see figure below). In this regard, standard deviation and OD error were calculated and reported in Table S4 and S5.

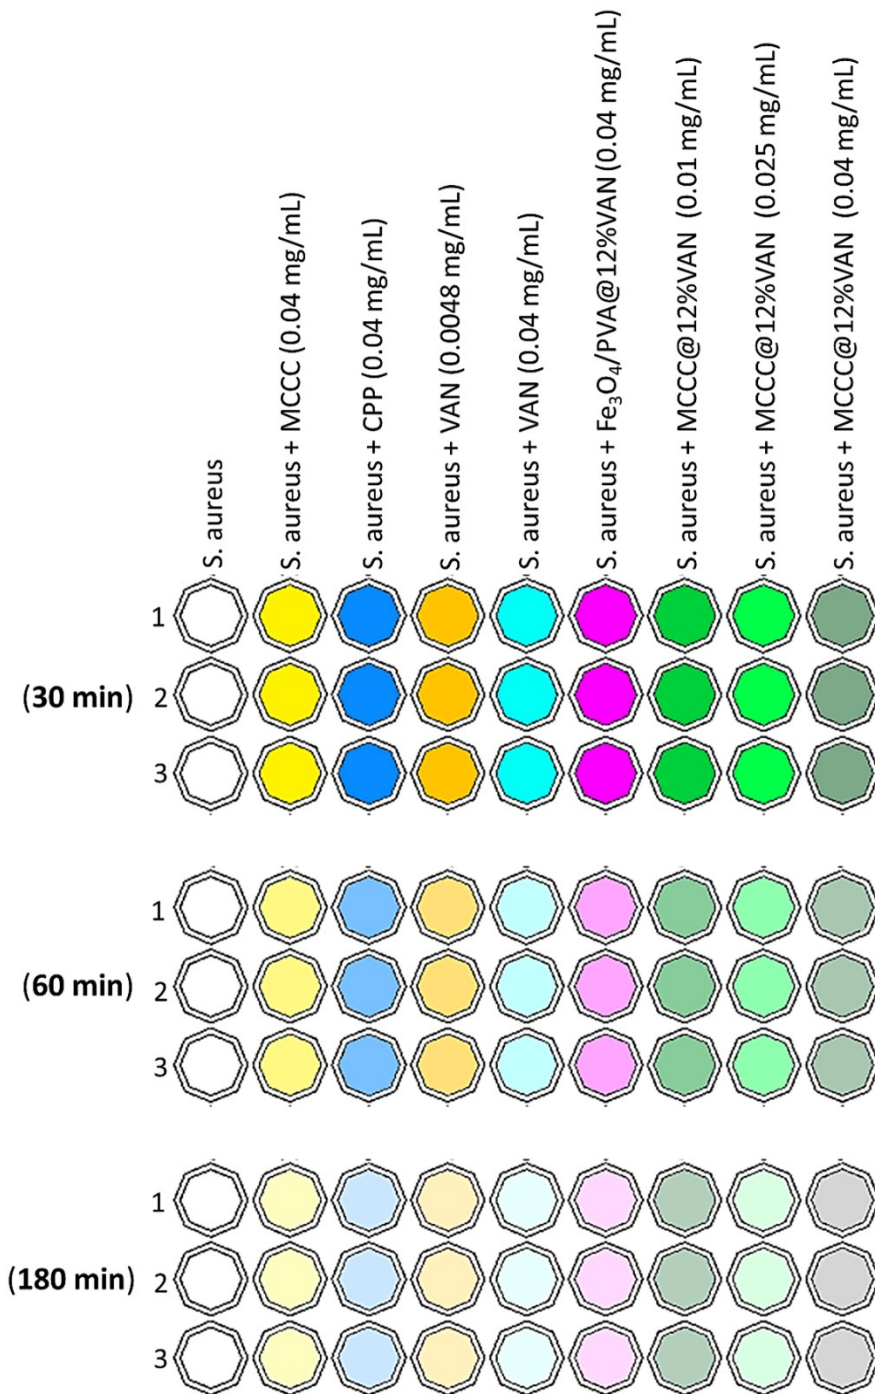

The calculation methods for standard deviation and the errors are explained below:

- Standard deviation for each condition has been obtained by excel software.
- To obtain error for each condition, the average OD value for three wells was calculated and the absolute error ( $\pm$ ) was obtained using maximum and minimum values of OD (see following figure). For instance, for *S. aureus* (control) after 180 min incubation OD values for three identical samples are as below:

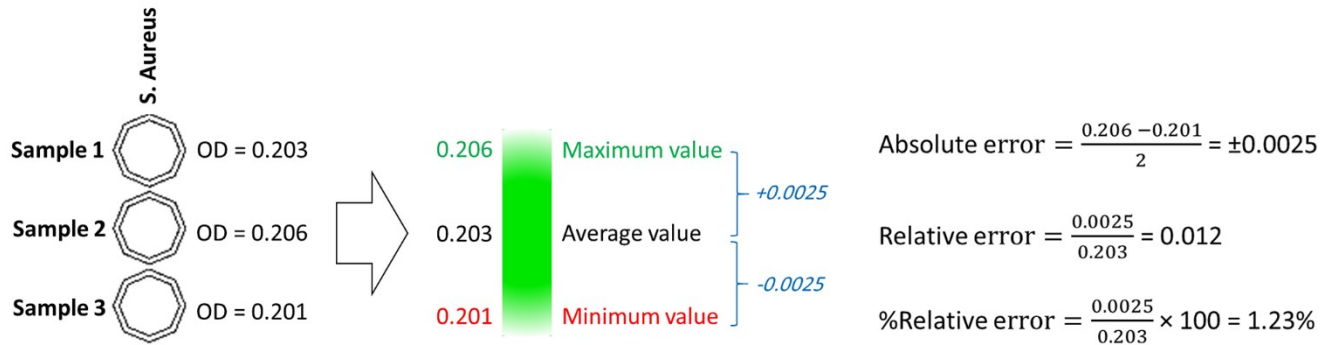

*Standard deviation (calculated by excel software) = 0.0025*

*Absolute error =  $\pm(OD_{max} - OD_{min} / 2) = \pm 0.0025$*

*Relative error = absolute error / real value =  $0.0025 / 0.203 = 0.012$*

*%Relative error = (absolute error / real value)  $\times 100 = 1.23\%$*

**Then, cell-killing potency (%CKP) of each sample is calculated by the following equation:**

$$\%CKP = - (A/A_0 - 1) \times 100$$

Whereas, A is UV-vis absorbance of the desired sample, and  $A_0$  is the UV-vis absorbance of the control (*S. aureus* and *E. coli*) at each time (30, 60, and 180 min).

**Table S4.** Statistical data of OD experiment on *S. aureus* cell line.

| Time (min) | Conditions                                                          | OD <sup>a</sup> (a.u.) | STDEV <sup>b</sup> | %Rel. E <sup>c</sup> | CKP <sup>d</sup> (%) |
|------------|---------------------------------------------------------------------|------------------------|--------------------|----------------------|----------------------|
| 30         | S. aureus (control)                                                 | 0.067                  | 0.003              | 4.4                  | -                    |
|            | S. aureus + MCCC (0.04 mg/mL)                                       | 0.064                  | 0.004              | 6.2                  | 4.5                  |
|            | S. aureus + CPP (0.04 mg/mL)                                        | 0.062                  | 0.005              | 8.0                  | 7.5                  |
|            | S. aureus + VAN (0.0048 mg/mL)                                      | 0.055                  | 0.005              | 9.0                  | 17.9                 |
|            | S. aureus + VAN (0.04 mg/mL)                                        | 0.038                  | 0.006              | 17.1                 | 43.3                 |
|            | S. aureus + Fe <sub>3</sub> O <sub>4</sub> /PVA@12%VAN (0.04 mg/mL) | 0.052                  | 0.003              | 5.7                  | 22.4                 |
|            | S. aureus + MCCC@12%VAN (0.01 mg/mL)                                | 0.05                   | 0.003              | 6.0                  | 25.4                 |
|            | S. aureus + MCCC@12%VAN (0.025 mg/mL)                               | 0.017                  | 0.003              | 20.5                 | 74.6                 |
|            | S. aureus + MCCC@12%VAN (0.04 mg/mL)                                | 0.012                  | 0.003              | 25                   | 82                   |
| 60         | S. aureus (control)                                                 | 0.167                  | 0.003              | 2.0                  | -                    |
|            | S. aureus + MCCC (0.04 mg/mL)                                       | 0.159                  | 0.004              | 2.5                  | 4.8                  |
|            | S. aureus + CPP (0.04 mg/mL)                                        | 0.149                  | 0.002              | 1.7                  | 10.8                 |
|            | S. aureus + VAN (0.0048 mg/mL)                                      | 0.12                   | 0.002              | 2.0                  | 28.1                 |
|            | S. aureus + VAN (0.04 mg/mL)                                        | 0.036                  | 0.004              | 11.1                 | 78.5                 |
|            | S. aureus + Fe <sub>3</sub> O <sub>4</sub> /PVA@12%VAN (0.04 mg/mL) | 0.05                   | 0.003              | 6.0                  | 70                   |
|            | S. aureus + MCCC@12%VAN (0.01 mg/mL)                                | 0.041                  | 0.002              | 6.2                  | 75.5                 |
|            | S. aureus + MCCC@12%VAN (0.025 mg/mL)                               | 0.016                  | 0.002              | 15.6                 | 90.4                 |
|            | S. aureus + MCCC@12%VAN (0.04 mg/mL)                                | 0.015                  | 0.003              | 23.3                 | 91                   |
| 180        | S. aureus (control)                                                 | 0.203                  | 0.002              | 1.2                  | -                    |
|            | S. aureus + MCCC (0.04 mg/mL)                                       | 0.19                   | 0.015              | 7.8                  | 6.4                  |
|            | S. aureus + CPP (0.04 mg/mL)                                        | 0.181                  | 0.003              | 1.6                  | 10.8                 |
|            | S. aureus + VAN (0.0048 mg/mL)                                      | 0.14                   | 0.002              | 1.7                  | 31.0                 |
|            | S. aureus + VAN (0.04 mg/mL)                                        | 0.023                  | 0.002              | 17.4                 | 88.7                 |
|            | S. aureus + Fe <sub>3</sub> O <sub>4</sub> /PVA@12%VAN (0.04 mg/mL) | 0.043                  | 0.002              | 5.8                  | 78.8                 |
|            | S. aureus + MCCC@12%VAN (0.01 mg/mL)                                | 0.029                  | 0.004              | 16.0                 | 85.7                 |
|            | S. aureus + MCCC@12%VAN (0.025 mg/mL)                               | 0.014                  | 0.003              | 21.4                 | 93.1                 |
|            | S. aureus + MCCC@12%VAN (0.04 mg/mL)                                | 0.005                  | 0.0002             | 31.0                 | 97.5                 |

<sup>a</sup> OD: average optical density for three identical samples

<sup>b</sup> STDEV: standard deviation of three identical samples

<sup>c</sup> %Rel. E: relative error percentage for three identical samples

<sup>d</sup> CKP: bacteria cell-killing potency during 180 min

It should be noted that in low concentrations the relation between the concentration and UV-vis absorbance may not be linear (but it was assumed linear).

**Table S5.** Statistical data of OD experiment on *E. coli* cell line.

| Time (min) | Conditions                                                               | OD (a.u.) | STDEV | %Rel. E | CKP (%) |
|------------|--------------------------------------------------------------------------|-----------|-------|---------|---------|
| 30         | <i>E. coli</i> (control)                                                 | 0.461     | 0.004 | 0.97    | -       |
|            | <i>E. coli</i> + MCCC (0.04 mg/mL)                                       | 0.452     | 0.003 | 0.44    | 1.9     |
|            | <i>E. coli</i> + CPP (0.04 mg/mL)                                        | 0.446     | 0.006 | 1.3     | 3.2     |
|            | <i>E. coli</i> + VAN (0.0048 mg/mL)                                      | 0.42      | 0.02  | 4.7     | 8.9     |
|            | <i>E. coli</i> + VAN (0.04 mg/mL)                                        | 0.386     | 0.005 | 1.3     | 16.3    |
|            | <i>E. coli</i> + Fe <sub>3</sub> O <sub>4</sub> /PVA@12%VAN (0.04 mg/mL) | 0.408     | 0.005 | 1.2     | 11.5    |
|            | <i>E. coli</i> + MCCC@12%VAN (0.01 mg/mL)                                | 0.402     | 0.007 | 1.7     | 12.8    |
|            | <i>E. coli</i> + MCCC@12%VAN (0.025 mg/mL)                               | 0.395     | 0.005 | 1.3     | 14.3    |
| 60         | <i>E. coli</i> (control)                                                 | 0.267     | 0.003 | 1.1     | 42      |
|            | <i>E. coli</i> (control)                                                 | 0.484     | 0.005 | 1.1     | -       |
|            | <i>E. coli</i> + MCCC (0.04 mg/mL)                                       | 0.468     | 0.004 | 0.85    | 3.3     |
|            | <i>E. coli</i> + CPP (0.04 mg/mL)                                        | 0.456     | 0.005 | 1.1     | 5.8     |
|            | <i>E. coli</i> + VAN (0.0048 mg/mL)                                      | 0.42      | 0.005 | 1.3     | 13.2    |
|            | <i>E. coli</i> + VAN (0.04 mg/mL)                                        | 0.285     | 0.005 | 1.9     | 41.1    |
|            | <i>E. coli</i> + Fe <sub>3</sub> O <sub>4</sub> /PVA@12%VAN (0.04 mg/mL) | 0.379     | 0.01  | 2.6     | 21.7    |
|            | <i>E. coli</i> + MCCC@12%VAN (0.01 mg/mL)                                | 0.34      | 0.005 | 1.4     | 29.7    |
| 180        | <i>E. coli</i> + MCCC@12%VAN (0.025 mg/mL)                               | 0.315     | 0.004 | 1.3     | 34.9    |
|            | <i>E. coli</i> + MCCC@12%VAN (0.04 mg/mL)                                | 0.115     | 0.003 | 4.3     | 76.2    |
|            | <i>E. coli</i> (control)                                                 | 0.558     | 0.007 | 1.3     | -       |
|            | <i>E. coli</i> + MCCC (0.04 mg/mL)                                       | 0.54      | 0.02  | 3.7     | 3.2     |
|            | <i>E. coli</i> + CPP (0.04 mg/mL)                                        | 0.526     | 0.005 | 1.0     | 5.7     |
|            | <i>E. coli</i> + VAN (0.0048 mg/mL)                                      | 0.43      | 0.01  | 2.3     | 22.9    |
|            | <i>E. coli</i> + VAN (0.04 mg/mL)                                        | 0.2       | 0.02  | 10      | 64.1    |
|            | <i>E. coli</i> + Fe <sub>3</sub> O <sub>4</sub> /PVA@12%VAN (0.04 mg/mL) | 0.31      | 0.03  | 9.9     | 44.4    |
|            | <i>E. coli</i> + MCCC@12%VAN (0.01 mg/mL)                                | 0.251     | 0.005 | 2.0     | 55.0    |
|            | <i>E. coli</i> + MCCC@12%VAN (0.025 mg/mL)                               | 0.204     | 0.004 | 2.2     | 63.4    |
|            | <i>E. coli</i> + MCCC@12%VAN (0.04 mg/mL)                                | 0.049     | 0.003 | 7.1     | 91.2    |

**Relative errors for ZOI experiment:**

This test was repeated for three times for each sample. Standard deviations and relative errors were calculated via the explained method, and reported in table below:

**Table S6.** Statistical data of ZOI experiment.

| Cell line | Sample <sup>a</sup>                        | ZOI <sup>b</sup> (cm) | STDEV | %Rel. E |
|-----------|--------------------------------------------|-----------------------|-------|---------|
| S. aureus | CPP                                        | Trace                 | -     | -       |
|           | MCCC                                       | Trace                 | -     | -       |
|           | VAN                                        | 1.25                  | 0.02  | 1.6     |
|           | Fe <sub>3</sub> O <sub>4</sub> /PVA@12%VAN | 0.46                  | 0.01  | 2.1     |
|           | MCCC@12%VAN                                | 1.375                 | 0.01  | 0.7     |
| E. coli   | CPP                                        | Trace                 | -     | -       |
|           | MCCC                                       | Trace                 | -     | -       |
|           | VAN                                        | 0.875                 | 0.02  | 2.3     |
|           | Fe <sub>3</sub> O <sub>4</sub> /PVA@12%VAN | 0.41                  | 0.01  | 2.4     |
|           | MCCC@12%VAN                                | 0.125                 | 0.01  | 0.9     |

<sup>a</sup> The same weight (0.01 g) was used for all samples.

<sup>b</sup> Average value is reported for three times repeating the experiment.
